# Supplementary material for: Hydrogels Based on Poly([2-(acryloxy)ethyl] Trimethylammonium Chloride) and Nanocellulose Applied to Remove Methyl Orange Dye from Water
Source: MDPI journal article supplement (doi:10.3390/polym13142265), 2021-07-10
Supplement: s1 [file s1]

# Supplementary Material: Hydrogels Based on Poly([2-(Acryloxy)Ethyl] Trimethylammo-nium Chloride) and Nanocellulose Applied to Remove Methyl Orange Dye from Water

Karina Roa <sup>1</sup>, Yesid Tapiero <sup>1</sup>, Musthafa Ottakam Thotiyl <sup>2</sup> and Julio Sánchez <sup>1,\*</sup>

<sup>1</sup> Departamento de Ciencias del Ambiente, Facultad de Química y Biología, Universidad de Santiago de Chile (USACH), Santiago, 9160000, Chile; karina.roa@usach.cl (K.R.); yesidtm@gmail.com (Y.T.)

<sup>2</sup> Department of Chemistry, IISER Pune, Dr. Homi Bhabha Road, Pune 411008, India; musmuhammed@gmail.com

\* Correspondence: julio.sanchez@usach.cl

**Table S1.** ANOVA results, where the significance is 0,05: a) Yield of the reaction, b) Crosslinking degree, and c) Water absorption capacity. DF (degree of freedom of the data), SS (the sum of the squares of the data), MS (mean sum of the squares of the data), F (F-statistic), value-p (p-value) and F<sub>critical</sub> (F-statistic critical value).

| a) %Y                             |    |         |         |       |         |                       |
|-----------------------------------|----|---------|---------|-------|---------|-----------------------|
| Source                            | DF | SS      | MS      | F     | value-p | F <sub>critical</sub> |
| Model                             | 7  | 13167,5 | 1881,1  | 3,41  | 0,126   | 6,09                  |
| Linear fit                        | 3  | 13156,1 | 4385,4  | 7,95  | 0,037   | 6,65                  |
| MBA mol%                          | 1  | 0,2     | 0,2     | 0     | 0,984   | 7,71                  |
| APS mol%                          | 1  | 1,4     | 1,4     | 0     | 0,962   | 7,71                  |
| FNC w/w%                          | 1  | 13154,4 | 13154,4 | 23,85 | 0,008   | 7,71                  |
| Adjustment of 2-term interactions | 3  | 2,1     | 0,7     | 0     | 1       | 6,59                  |
| MBA mol%*APS mol%                 | 1  | 2       | 2       | 0     | 0,955   | 7,71                  |
| MBA mol%*FNC w/w%                 | 1  | 0,1     | 0,1     | 0     | 0,989   | 7,71                  |
| APS mol%*FNC w/w%                 | 1  | 0       | 0       | 0     | 0,995   | 7,71                  |
| Adjustment of 3-term interactions | 1  | 9,2     | 9,2     | 0,02  | 0,903   | 7,71                  |
| MBA mol%*APS mol%*FNC w/w%        | 1  | 9,2     | 9,2     | 0,02  | 0,903   | 7,71                  |
| Error                             | 4  | 2206,5  | 551,6   |       |         |                       |
| Total                             | 11 | 15374   |         |       |         |                       |

| b) %WA                            |    |          |          |      |         |                       |
|-----------------------------------|----|----------|----------|------|---------|-----------------------|
| Source                            | DF | SS       | MS       | F    | value-p | F <sub>critical</sub> |
| Model                             | 7  | 50879982 | 7268569  | 1,16 | 0,471   | 6,09                  |
| Linear fit                        | 3  | 20411878 | 68033959 | 1,08 | 0,452   | 6,65                  |
| MBA mol%                          | 1  | 8106756  | 8106756  | 1,29 | 0,32    | 7,71                  |
| APS mol%                          | 1  | 2606106  | 2606106  | 0,41 | 0,555   | 7,71                  |
| FNC w/w%                          | 1  | 9699016  | 9699016  | 1,54 | 0,282   | 7,71                  |
| Adjustment of 2-term interactions | 3  | 24843153 | 8281051  | 1,32 | 0,385   | 6,59                  |
| MBA mol%*APS mol%                 | 1  | 9481223  | 9481223  | 1,51 | 0,287   | 7,71                  |
| MBA mol%*FNC w/w%                 | 1  | 5291310  | 5291310  | 0,84 | 0,411   | 7,71                  |
| APS mol%*FNC w/w%                 | 1  | 10070620 | 10070620 | 1,6  | 0,274   | 7,71                  |
| Adjustment of 3-term interactions | 1  | 5624950  | 5624950  | 0,89 | 0,398   | 7,71                  |
| MBA mol%*APS mol%*FNC w/w%        | 1  | 5624950  | 5624950  | 0,89 | 0,398   | 7,71                  |
| Error                             | 4  | 25151738 | 6287935  |      |         |                       |
| Total                             | 11 | 76031720 |          |      |         |                       |

| c) %Cd     |    |          |          |      |         |                       |
|------------|----|----------|----------|------|---------|-----------------------|
| Source     | DF | SS       | MS       | F    | value-p | F <sub>critical</sub> |
| Model      | 7  | 0,000005 | 0,000001 | 1,34 | 0,154   | 6,09                  |
| Linear fit | 3  | 0,000002 | 0,000001 | 1,6  | 0,775   | 6,65                  |

---

|                                   |    |          |          |      |       |      |
|-----------------------------------|----|----------|----------|------|-------|------|
| MBA mol%                          | 1  | 0,000001 | 0,000001 | 1,4  | 0,728 | 7,71 |
| APS mol%                          | 1  | 0,000002 | 0,000002 | 3,3  | 0,451 | 7,71 |
| FNC w/w%                          | 1  | 0        | 0        | 0,1  | 0,614 | 7,71 |
| Adjustment of 2-term interactions | 3  | 0,000002 | 0,000001 | 1,5  | 0,177 | 6,59 |
| MBA mol%*APS mol%                 | 1  | 0,000001 | 0,000001 | 2,3  | 0,209 | 7,71 |
| MBA mol%*FNC w/w%                 | 1  | 0,000001 | 0,000001 | 1,3  | 0,138 | 7,71 |
| APS mol%*FNC w/w%                 | 1  | 0        | 0        | 0,94 | 0,184 | 7,71 |
| Adjustment of 3-term interactions | 1  | 0        | 0        | 0,08 | 0,027 | 7,71 |
| MBA mol%*APS mol%*FNC w/w%        | 1  | 0        | 0        | 0,08 | 0,027 | 7,71 |
| Error                             | 4  | 0,000002 | 0,000001 |      |       |      |
| Total                             | 11 | 0,000007 |          |      |       |      |

---
